# Supplementary material for: Prevalence and impact of dental caries and consequences of non-treatment on the quality of life of schoolchildren.
Source: Research Square preprint supplement (doi:10.21203/rs.3.rs-2097455/v1), 2022-10-04
Supplement: Supplementary file 1 [file 5f66e5ef0430d855732e8aa4.docx]

Chart 1: Classification based on oral condition related to dental caries.

| **Classification** | **Description** |
| --- | --- |
| Caries free | Children with healthy dentition, without caries, restorations or absence of teeth due to caries. |
| Caries history | Children with at least one restored tooth/lost by caries. |
| Carious | Children with at least one carious tooth/restored with caries. |
| Consequences of untreated caries | Children with at least one tooth with exposed pulp, ulceration, fistula or dental abscess (PUFA/pufa>0). |

Note: Modification of Alves et al. [28], based on the criteria of the World Health Organization [20] and Monse et al. [21].
